# Supplementary material for: Evaluation of Pediatric-Specific Wheelchair-Skills-Training Tools By Primary Users: A Descriptive Qualitative Study
Source: Research Square preprint supplement (doi:10.21203/rs.3.rs-955768/v1), 2021-10-21
Supplement: Supplementary file 2 [file d1fde1bc1b14692e7a1a331e.docx]

**Additional file 1**

Matrix for coding occupational therapists’ data following the Framework method (Gale et al., 2013)

| **Global satisfaction:**  **Meets the intended user’s needs and expectations.** | | | | |
| --- | --- | --- | --- | --- |
|  | Storybook | Posters | Training workbook | In general |
| First impression |  |  |  |  |
| Time saving |  |  |  |  |
| User engagement |  |  |  |  |
| Playfulness |  |  |  |  |
| Other |  |  |  |  |
| **Usability:**  **Ease of targeted users to use the tools in terms of format and presentation (aesthetics)**  **Ease of targeted users to understand the tools’ content** | | | | |
|  | Storybook | Posters | Training workbook | In general |
| Colors |  |  |  |  |
| Characters |  |  |  |  |
| Fonts |  |  |  |  |
| Elements organization |  |  |  |  |
| Medium (paper/electronic) |  |  |  |  |
| Language level |  |  |  |  |
| Skills presentation |  |  |  |  |
| Other |  |  |  |  |
| **Relevance:**  **“Relevance” indicates that intended users find the information or knowledge applicable and important to their professional work.** | | | | |
|  | Storybook | Posters | Training workbook | In general |
| Intention to use |  |  |  |  |
| Collaborators |  |  |  |  |
| Context of use |  |  |  |  |
| Other |  |  |  |  |
| **Feasibility:**  **Character of what is feasible, achievable** | | | | |
|  | Storybook | Posters | Training workbook | In general |
| Available time in daily practice |  |  |  |  |
| Colleague openness |  |  |  |  |
| Opening of the organization - administration |  |  |  |  |
| Other |  |  |  |  |
| **Other comments** | | | | |
|  | Storybook | Posters | Training workbook | In general |
| Other |  |  |  |  |
| **Suggestions - Specific comments for changes** | | | | |
|  | Storybook | Posters | Training workbook | In general |
| Suggestions |  |  |  |  |
